# Supplementary material
Source: HighWire-hosted journal article supplement (https://bmjopen.bmj.com/content/11/4/e042317)
Supplement: inline-supplementary-material-1 [file inline-supplementary-material-1.pdf]

**Table S1. Comparison between participants with and without incident cerebral infarction.**

| Characteristic                   | Without incident cerebral infarction | With incident cerebral infarction | <i>P</i> -value* |
|----------------------------------|--------------------------------------|-----------------------------------|------------------|
|                                  | (N=112,927)                          | (N=1,450)                         |                  |
| Person-year (average)            | 4.36± (0.44)                         | 2.50± (1.29)                      | <0.001           |
| Age (years)                      | 57.0 ± (8.3)                         | 65.1 ± (9.4)                      | <0.001           |
| BMI (kg/m <sup>2</sup> )         | 24.0 ± (2.8)                         | 23.9 ± (2.8)                      | 0.185            |
| Systolic BP (mmHg)               | 126.3 ± (14.7)                       | 131.2 ± (16.8)                    | <0.001           |
| Diastolic BP (mmHg)              | 78.9 ± (9.8)                         | 79.9 ± (10.7)                     | <0.001           |
| Total cholesterol (mg/dL)        | 196.2 ± (36.4)                       | 196.3 ± (38.4)                    | 0.965            |
| Triglyceride (mg/dL)             | 153.1 ± (103.5)                      | 159.1 ± (107.3)                   | 0.028            |
| HDL-cholesterol (mg/dL)          | 53.2 ± (29.7)                        | 52.2 ± (35.9)                     | 0.305            |
| LDL-cholesterol (mg/dL)          | 114.2 ± (38.5)                       | 114.2 ± (36.2)                    | 0.997            |
| Fasting blood glucose<br>(mg/dL) | 102.9 ± (27.1)                       | 109.2 ± (33.7)                    | <0.001           |
| SCr (mg/dL)                      | 1.33 ± (1.76)                        | 1.25 ± (1.38)                     | 0.024            |

|                                       |               |               |        |
|---------------------------------------|---------------|---------------|--------|
| eGFR (mL/min per 1.73m <sup>2</sup> ) | 80.3 ± (20.9) | 74.9 ± (19.5) | <0.001 |
| AST (U/L)                             | 27.9 ± (17.6) | 28.2 ± (30.1) | 0.692  |
| ALT (U/L)                             | 27.9 ± (19.8) | 26.3 ± (26.4) | 0.023  |
| GGT (U/L)                             | 50.7 ± (65.1) | 55.0 ± (73.1) | 0.027  |
| Smoking amount (pack-year)            | 13.8 ± (16.0) | 16.5 ± (18.5) | <0.001 |
| Smoking status                        |               |               | <0.001 |
| Non smoker                            | 39,881(34.87) | 534 (0.47)    |        |
| Former smoker                         | 36,509(31.92) | 376 (0.33)    |        |
| Current smoker                        | 36,537(31.94) | 540 (0.47)    |        |
| Alcohol intake (%)                    | 23.9          | 25.7          | 0.119  |
| Physical activity (%)                 | 18.1          | 17.8          | 0.817  |

Data are expressed as means (standard deviation) or percentages.

\**P*-value by t-test for continuous variables and Chi square test for categorical variables.
